# Supplementary material
Source: PubMed Central journal article supplement (PMC6686185)
Supplement: NIHMS1040986-supplement-FIG_S1.pdf [file NIHMS1040986-supplement-FIG_S1.pdf]

Fig. S1

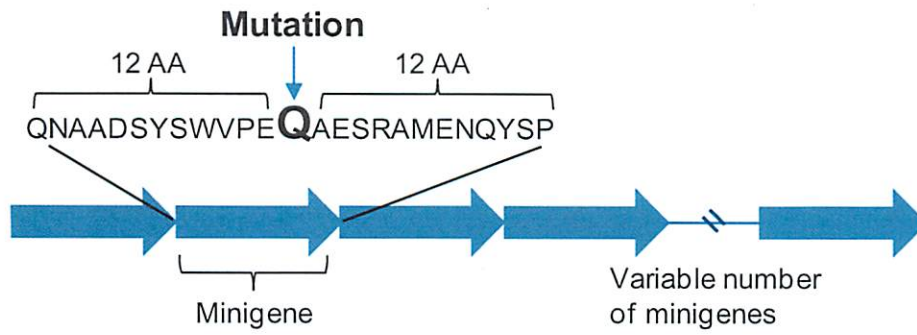

**Fig. S1. Basic anatomy of a tandem minigene (TMG) construct.** The TMG construct consists of a variable number of minigenes genetically fused together. Each minigene encodes for a mutation flanked by 12 amino acids (AA) from the endogenous protein.
