# Supplementary material
Source: PubMed Central journal article supplement (PMC6686185)
Supplement: NIHMS1040986-supplement-FIG_S3.pdf [file NIHMS1040986-supplement-FIG_S3.pdf]

Fig. S3

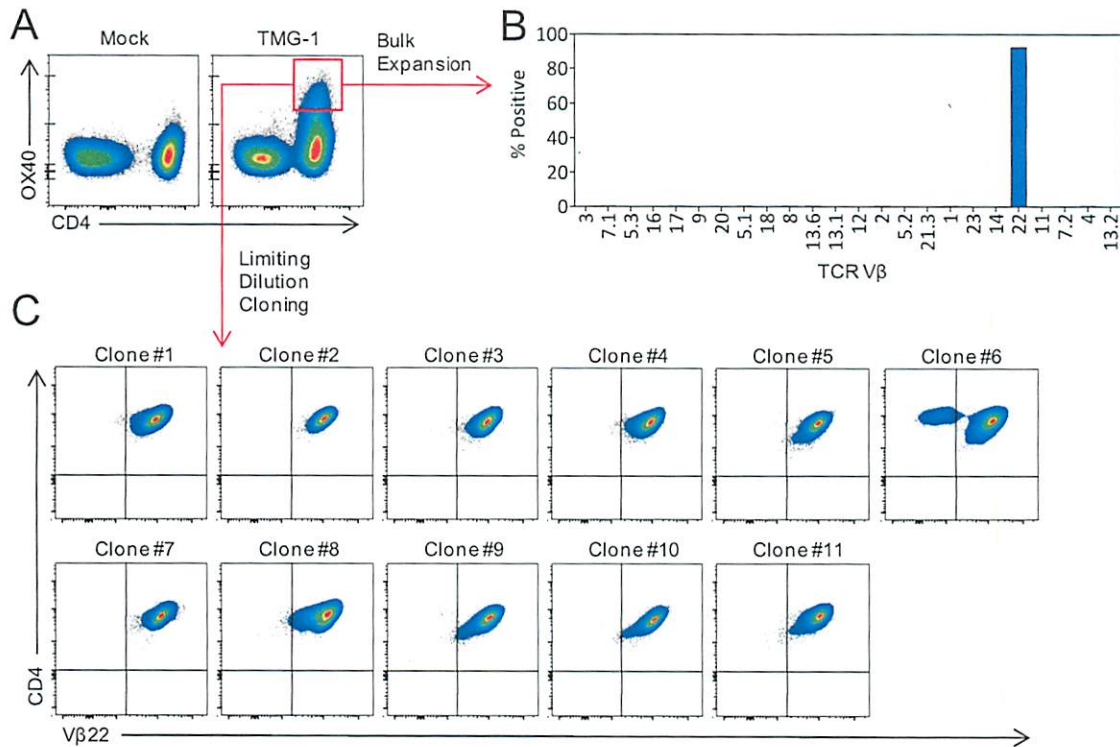

**Fig. S3. Assessing clonality of ERBB2IP mutation-reactive CD4<sup>+</sup> T cells.** (A) Patient 3737-TIL were co-cultured with DCs transfected with nothing (Mock) or TMG-1. CD4<sup>+</sup> T cells that upregulated OX40 at t = 24 h (red box) were sorted by FACS and then expanded in bulk (B) or cloned by limiting dilution (C) using irradiated allogeneic feeders in the presence of anti-CD3 antibody (OKT3, 30 ng/ml) and IL-2 (3000 IU/ml). Flow-cytometry based TCR-V $\beta$  repertoire analysis was performed on (B) and V $\beta$ 22-specific staining was done on (C). Data are gated on live CD3<sup>+</sup> cells.
