# Supplementary material
Source: PubMed Central journal article supplement (PMC6686185)
Supplement: NIHMS1040986-supplement-FIG_S5.pdf [file NIHMS1040986-supplement-FIG_S5.pdf]

Fig. S5

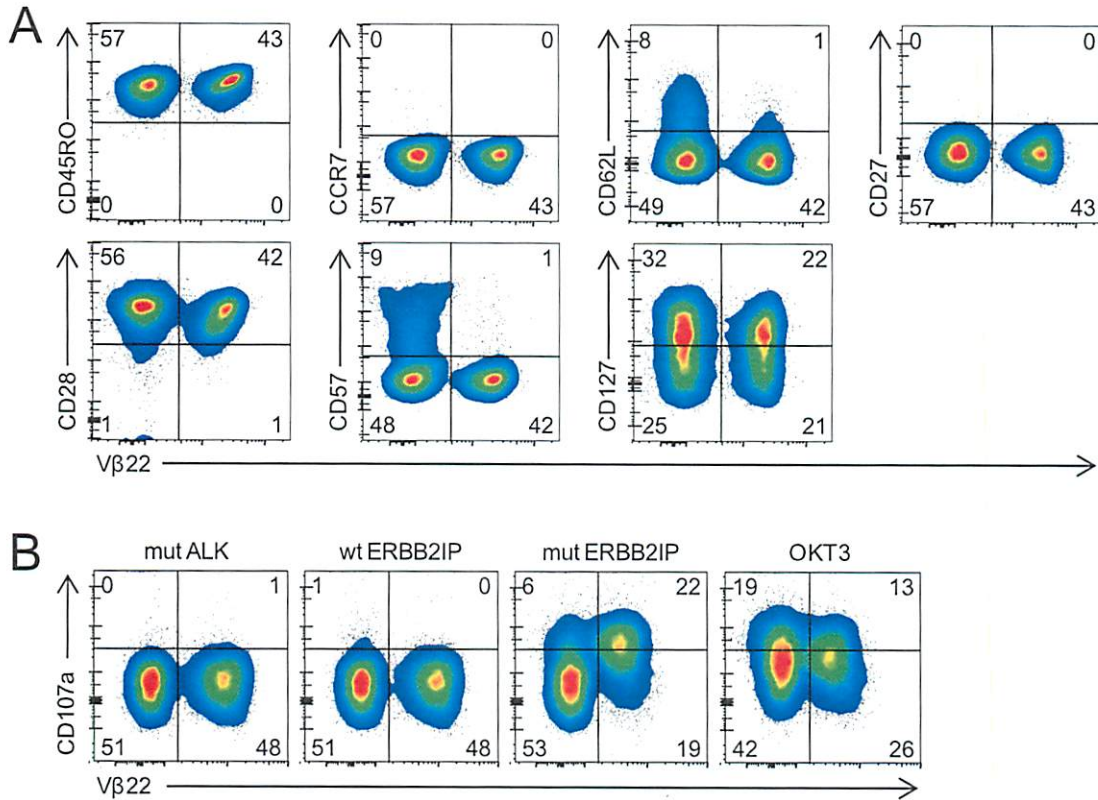

**Fig. S5. T-cell differentiation phenotype and cytolytic potential of Patient 3737-TIL.** (A) Patient 3737-TIL were assessed for expression of V $\beta$ 22 (representing ERBB2IP-mutation-reactive T cells) and the indicated T-cell differentiation markers. Data are gated on live CD3<sup>+</sup>CD4<sup>+</sup> cells. Positive and negative quadrant gates were set using isotype stained or unstained cells. Human peripheral blood cells (containing T cells of all differentiation stages) were included in experiments to ensure that the antibodies were working (data not shown). (B) Patient 3737-TIL were co-cultured for 6 h with autologous B cells pulsed overnight with wild-type (wt) ERBB2IP, or mutated (mut) ALK or mut ERBB2IP 25-AA long peptides. Antibodies specific for the degranulation marker CD107a were added at the beginning of the co-culture. Flow cytometry was used to assess expression of V $\beta$ 22 and to detect cell surface mobilization of CD107a. Data are gated on the CD4<sup>+</sup> population. All data are representative of at least two independent experiments.
