# Supplementary material
Source: PubMed Central journal article supplement (PMC6686185)
Supplement: NIHMS1040986-supplement-FIG_S6.pdf [file NIHMS1040986-supplement-FIG_S6.pdf]

Fig. S6

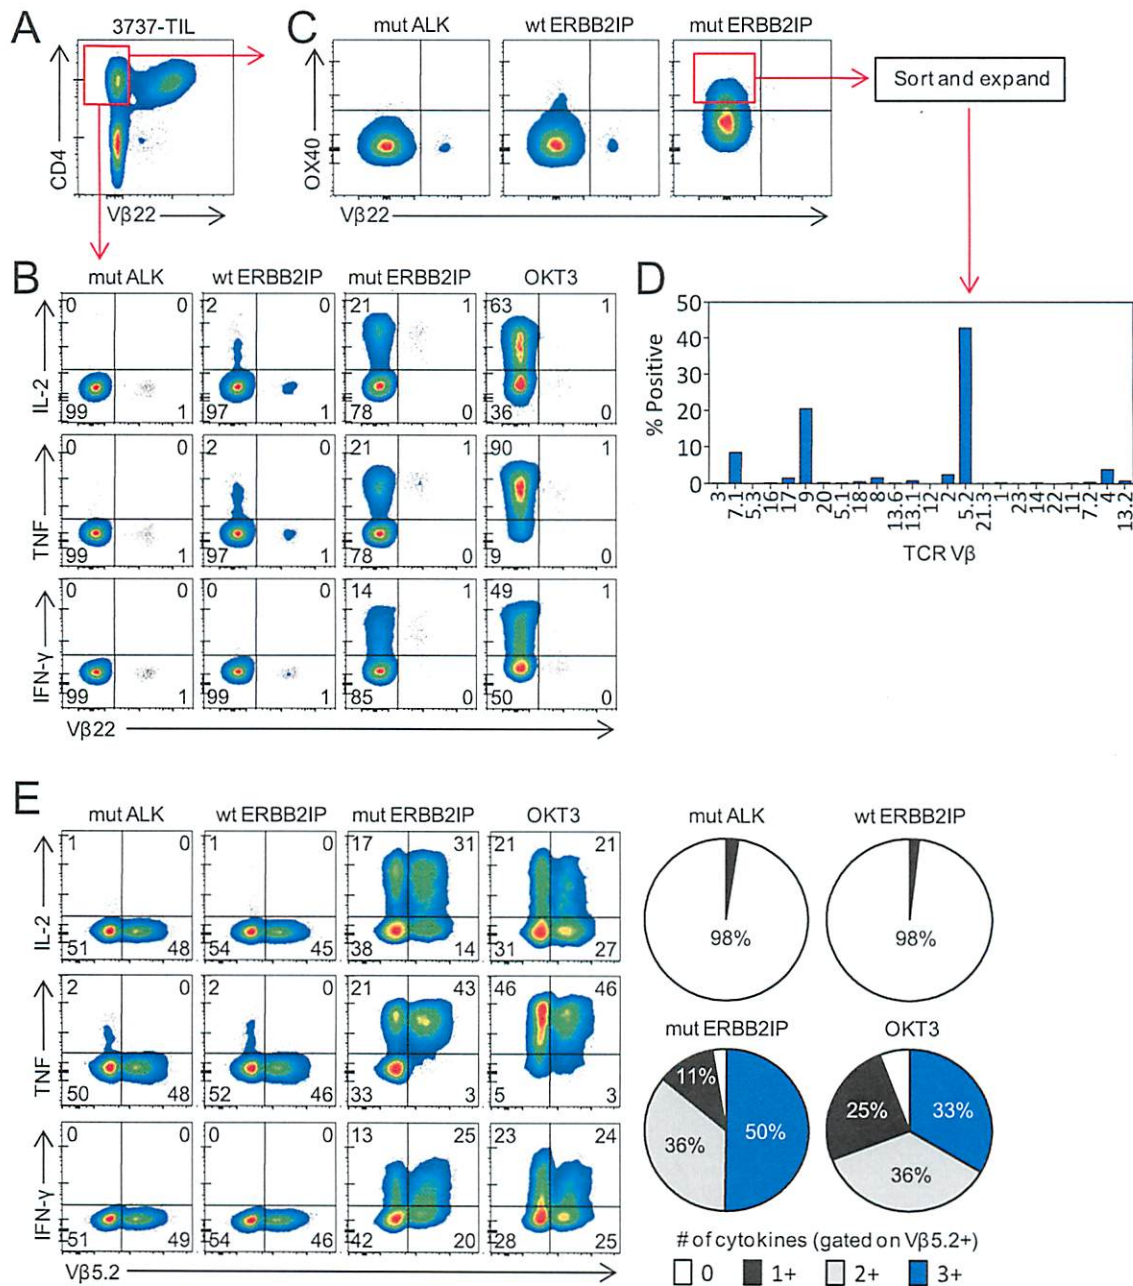

**Fig. S6. Patient 3737-TIL contain Vβ22-negative ERBB2IP-mutation-reactive T cells.** (A) CD4+ Vβ22-negative cells present in Patient 3737-TIL were sorted by FACS (red box). (B-C) These cells were then rested in IL-2 containing media for 2 days prior to being co-cultured with autologous B cells pulsed overnight with wild-type (wt) ERBB2IP, or mutated (mut) ALK or mut ERBB2IP 25-AA long peptides. (B) Flow cytometry was used to assess expression of Vβ22 and to detect intracellular production of IL-2, TNF, and IFN-γ in the CD4+ population at 6 h post-stimulation. (C) Flow cytometry was used to assess expression OX40 and Vβ22 in the CD4+ population at 24 h

post stimulation. Cells that upregulated OX40 were sorted (red box) and expanded, and the TCR-V $\beta$  repertoire was analyzed by flow cytometry (D). Data are gated on live CD4+ cells. (E) The sorted cells described in (D) were co-cultured for 6 h with autologous B cells pulsed overnight with wt ERBB2IP, or mut ALK or mut ERBB2IP 25-AA long peptides. Flow cytometry was used to assess expression of V $\beta$ 5.2 and to detect intracellular production of IL-2, TNF, and IFN- $\gamma$  in the CD4+ population. Pie charts display the percentage of V $\beta$ 5.2+ cells that expressed the indicated number of cytokines.
