# Supplementary material
Source: PubMed Central journal article supplement (PMC6686185)
Supplement: NIHMS1040986-supplement-TABLE_S1.pdf [file NIHMS1040986-supplement-TABLE_S1.pdf]

**Table S1.** Clinical characteristics of patient 3737

| Sex | Age | Primary                                                 | Metastatic sites | Prior Therapy                     | Prior IL-2 | Harvest site* | ECOG <sup>†</sup> Status | HLA-I                        | HLA-II                                                                      |
|-----|-----|---------------------------------------------------------|------------------|-----------------------------------|------------|---------------|--------------------------|------------------------------|-----------------------------------------------------------------------------|
| F   | 43  | Intrahepatic cholangiocarcinoma (poorly differentiated) | Lungs, liver     | Cisplatin + gemcitabine, taxotere | No         | Lung          | 0                        | A*26<br>B*38<br>B*52<br>C*12 | DRB1*0405<br>DRB1*1502<br>DQB1*0301<br>DQB1*0601<br>DPB1*0401<br>DPB1*10401 |

\* Harvest site for generation of TIL and for whole exomic sequencing.

† Performance status: ECOG, Eastern Cooperative Oncology Group
