# Supplementary material
Source: PubMed Central journal article supplement (PMC6686185)
Supplement: NIHMS1040986-supplement-TABLE_S2.pdf [file NIHMS1040986-supplement-TABLE_S2.pdf]

**Table S2.** Somatic mutations identified by whole-exome sequencing of a metastatic lung nodule\* from Patient 3737

| Gene Symbol | Gene Description                                                                        | Transcript Accession | Mutation Position              |                      | Mutation Type | Consequence          | % Mutant Reads* |
|-------------|-----------------------------------------------------------------------------------------|----------------------|--------------------------------|----------------------|---------------|----------------------|-----------------|
|             |                                                                                         |                      | Nucleotide (genomic)           | Amino Acid (protein) |               |                      |                 |
| ALK         | anaplastic lymphoma receptor tyrosine kinase                                            | CCDS33172.1          | chr2_29996620-29996620_C_T     | 137R>H               | Substitution  | Nonsynonymous coding | 30%             |
| AR          | androgen receptor                                                                       | CCDS14387.1          | chrX_66858483-66858483_C       | NA                   | Insertion     | Frameshift           | 31%             |
| CD93        | CD93 molecule                                                                           | CCDS13149.1          | chr20_23012929-23012929_C_T    | 634R>Q               | Substitution  | Nonsynonymous coding | 26%             |
| DIP2C       | DIP2 disco-interacting protein 2 homolog C (Drosophila)                                 | CCDS7054.1           | chr10_365545-365545_C_T        | NA                   | Substitution  | Splice site acceptor | 25%             |
| ERBB2IP     | erb2 interacting protein                                                                | CCDS3990.1           | chr5_65385316-65385316_A_G     | 805E>G               | Substitution  | Nonsynonymous coding | 59%             |
| FCER1A      | Fc fragment of IgE; high affinity I; receptor for; alpha polypeptide                    | CCDS1184.1           | chr1_157544227-157544227_G_C   | 219D>H               | Substitution  | Nonsynonymous coding | 30%             |
| GRXCR1      | glutaredoxin; cysteine rich 1                                                           | CCDS43225.1          | chr4_42590102-42590102_C_T     | 21A>V                | Substitution  | Nonsynonymous coding | 18%             |
| HLA-DOA     | HLA class II histocompatibility antigen, DO alpha chain precursor                       | CCDS4763.1           | chr6_33085209-33085209_C_T     | NA                   | Substitution  | Splice site donor    | 36%             |
| KIF9        | kinesin family member 9                                                                 | CCDS2752.1           | chr3_47287859-47287859_T_C     | 155T>A               | Substitution  | Nonsynonymous coding | 20%             |
| KLHL6       | kelch-like 6 (Drosophila)                                                               | CCDS3245.2           | chr3_184692410-184692413_CAGA_ | NA                   | Deletion      | Frameshift           | 20%             |
| LHX9        | LIM homeobox 9                                                                          | CCDS1393.1           | chr1_196164923-196164923_A_    | NA                   | Deletion      | Frameshift           | 21%             |
| LONRF3      | LON peptidase N-terminal domain and ring finger 3                                       | CCDS35374.1          | chrX_118007666-118007666_A_C   | NA                   | Substitution  | Splice site donor    | 10%             |
| NAGS        | N-acetylglutamate synthase                                                              | CCDS11473.1          | chr17_39440355-39440355_G_A    | 412R>H               | Substitution  | Nonsynonymous coding | 29%             |
| NLRP2       | NLR family; pyrin domain containing 2                                                   | CCDS12913.1          | chr19_60186650-60186650_G_T    | 591S>I               | Substitution  | Nonsynonymous coding | 32%             |
| PDZD2       | PDZ domain containing 2                                                                 | CCDS34137.1          | chr5_32124833-32124833_A_      | NA                   | Deletion      | Frameshift           | 30%             |
| POU5F2      | POU domain, class 5, transcription factor 2                                             | NM_153216            | chr5_93102847-93102847_A_C     | 60V>G                | Substitution  | Nonsynonymous coding | 34%             |
| RAC3        | ras-related C3 botulinum toxin substrate 3 (rho family; small GTP binding protein Rac3) | CCDS11798.1          | chr17_77584690-77584690_C_A    | 125T>N               | Substitution  | Nonsynonymous coding | 27%             |
| RAP1GDS1    | RAP1; GTP-GDP dissociation stimulator 1                                                 | CCDS43253.1          | chr4_99532209-99532209_C_A     | 198L>I               | Substitution  | Nonsynonymous coding | 19%             |
| RASA1       | RAS p21 protein activator (GTPase activating protein) 1                                 | CCDS34200.1          | chr5_86703757-86703757_C_T     | 589R>C               | Substitution  | Nonsynonymous coding | 63%             |
| RETSAT      | retinol saturase (all-trans-retinol 13;14-reductase)                                    | CCDS1972.1           | chr2_85424308-85424308_C_T     | 553R>K               | Substitution  | Nonsynonymous coding | 11%             |
| SEC24D      | SEC24 family; member D (S. cerevisiae)                                                  | CCDS3710.1           | chr4_119872085-119872085_A_G   | 901M>T               | Substitution  | Nonsynonymous coding | 18%             |
| SEN3        | SUMO1/sentrin/SMT3 specific peptidase 3                                                 | ENST00000321337      | chr17_7408824-7408824_A_G      | 292M>V               | Substitution  | Nonsynonymous coding | 33%             |
| SLIT1       | slit homolog 1 (Drosophila)                                                             | CCDS7453.1           | chr10_98753840-98753840_G_C    | 1280N>K              | Substitution  | Nonsynonymous coding | 45%             |

|               |                                     |             |                              |        |              |                      |     |
|---------------|-------------------------------------|-------------|------------------------------|--------|--------------|----------------------|-----|
| <b>TARBP1</b> | TAR (HIV-1) RNA binding protein 1   | CCDS1601.1  | chr1_232649342-232649342_C_A | 655G>V | Substitution | Nonsynonymous coding | 18% |
| <b>TGM6</b>   | transglutaminase 6                  | CCDS13025.1 | chr20_2332325-2332325_G_A    | 398D>N | Substitution | Nonsynonymous coding | 51% |
| <b>TTC39C</b> | tetratricopeptide repeat domain 39C | CCDS32804.1 | chr18_19966475-19966475_A_C  | 503N>T | Substitution | Nonsynonymous coding | 24% |

\* The tumor nodule was estimated to be approximately 70% tumor by pathological analysis of an H&E stained section.
