# Supplementary material
Source: PubMed Central journal article supplement (PMC6686185)
Supplement: NIHMS1040986-supplement-TABLE_S3.pdf [file NIHMS1040986-supplement-TABLE_S3.pdf]

**Table S3.** Tandem minigene (TMG) constructs

| TMG | Mutated Gene | Mutated* Minigene Amino Acid Sequence                                                                                                                                                                                                                                                                                                | TMG Amino Acid Sequence                                                                                                                                                                                                                                                                                   |
|-----|--------------|--------------------------------------------------------------------------------------------------------------------------------------------------------------------------------------------------------------------------------------------------------------------------------------------------------------------------------------|-----------------------------------------------------------------------------------------------------------------------------------------------------------------------------------------------------------------------------------------------------------------------------------------------------------|
| 1   | ALK          | RVLKGGSVRKL <b>R</b> HAKQLVLELGEEA                                                                                                                                                                                                                                                                                                   | RVLKGGSVRKL <b>R</b> HAKQLVLELGEEAQNAADSYSWVP                                                                                                                                                                                                                                                             |
|     | CD93         | QNAADSYSWVPE <b>Q</b> AESRAMENQYSP                                                                                                                                                                                                                                                                                                   | <b>E</b> QAESRAMENQYSPTSFLSINSKEET <b>G</b> HLENGNKYPN                                                                                                                                                                                                                                                    |
|     | ERBB2IP      | TSFLSINSKEET <b>G</b> HLENGNKYPNLE                                                                                                                                                                                                                                                                                                   | LEFIPLLVILFAV <b>H</b> TGLFISTQQQVTESDRPRKVRFR <b>I</b> V                                                                                                                                                                                                                                                 |
|     | FCER1A       | FIPLLVILFAV <b>H</b> TGLFISTQQQVT                                                                                                                                                                                                                                                                                                    | SSHSGRVLKEVYEIYNESLFDLLS <b>A</b> LPYVGPSVTPMT <b>G</b>                                                                                                                                                                                                                                                   |
|     | GRXCR1       | ESDRPRKVRFR <b>I</b> VSSHSGRVLKEVY                                                                                                                                                                                                                                                                                                   | KKLRDDYLASL <b>H</b> PRLHSIYVSEGYPDIKQELLRCDI <b>I</b> CK                                                                                                                                                                                                                                                 |
|     | KIF9         | EIYNESLFDLLS <b>A</b> LPYVGPSVTPMT                                                                                                                                                                                                                                                                                                   | GGHSTVTDLQVGTKLDLRDDDKD <b>N</b> IERLRDCKKLAPI                                                                                                                                                                                                                                                            |
|     | NAGS         | GKKLRDDYLASL <b>H</b> PRLHSIYVSEGY                                                                                                                                                                                                                                                                                                   |                                                                                                                                                                                                                                                                                                           |
|     | NLRP2        | PDIKQELLRCDI <b>I</b> CKGGHSTVTDLQ                                                                                                                                                                                                                                                                                                   |                                                                                                                                                                                                                                                                                                           |
|     | RAC3         | VGTKLDRDDDKD <b>N</b> IERLRDCKKLAPI                                                                                                                                                                                                                                                                                                  |                                                                                                                                                                                                                                                                                                           |
| 2   | RAP1GDS1     | VKLLGIHCQNA <b>I</b> TEMCLVAFGNLANLRKSSPGTSNK                                                                                                                                                                                                                                                                                        | VKLLGIHCQNA <b>I</b> TEMCLVAFGNLANLRKSSPGTSNK                                                                                                                                                                                                                                                             |
|     | RASA1        | NLRKSSPGTSNK <b>C</b> LRQVSSLVLHIE                                                                                                                                                                                                                                                                                                   | <b>C</b> LRQVSSLVLHIELGRLHPCVMASL <b>K</b> AQSPINLYLTG                                                                                                                                                                                                                                                    |
|     | RETSAT       | LGRHPCVMASL <b>K</b> AQSPINLYLTG                                                                                                                                                                                                                                                                                                     | LLPIHTLDVKST <b>T</b> LPAAVRCESRLMTMDNFGKHYYTL                                                                                                                                                                                                                                                            |
|     | SEC24D       | LLPIHTLDVKST <b>T</b> LPAAVRCESRL                                                                                                                                                                                                                                                                                                    | <b>K</b> SEAPLYVGGMPVMTMDNFGKHYYTL <b>K</b> SEAPLYVGG                                                                                                                                                                                                                                                     |
|     | SLIT1        | MTMDNFGKHYYTL <b>K</b> SEAPLYVGGMPV                                                                                                                                                                                                                                                                                                  | MPVHDGPFVFAEVN <b>A</b> NYITWLWHEDESRQAKEDFS                                                                                                                                                                                                                                                              |
|     | TARBP1       | AVDVEGMKTQYS <b>V</b> KQRTENVLRIFL                                                                                                                                                                                                                                                                                                   | GYDF <b>E</b> TRLHVRIHAALASPAVRPGICPGPD <b>G</b> WRIPLG                                                                                                                                                                                                                                                   |
|     | TGM6         | HDGPFVFAEVN <b>A</b> NYITWLWHEDESR                                                                                                                                                                                                                                                                                                   | PLPHEF                                                                                                                                                                                                                                                                                                    |
|     | TTC39C       | QAKEDFSGYDF <b>E</b> TRLHVRIHAALAS                                                                                                                                                                                                                                                                                                   |                                                                                                                                                                                                                                                                                                           |
|     | POU5F2       | PAVRPGICPGPD <b>G</b> WRIPLGPLPHEF                                                                                                                                                                                                                                                                                                   |                                                                                                                                                                                                                                                                                                           |
| 3   | SEN3         | VAQELFQGS <b>D</b> LGVAAEAERPGEKAG                                                                                                                                                                                                                                                                                                   | VAQELFQGS <b>D</b> LGVAAEAERPGEKAGGTATTLTDLTN                                                                                                                                                                                                                                                             |
|     | LHX9         | GTATTLTDLTN <b>P</b> LSL                                                                                                                                                                                                                                                                                                             | <b>P</b> LSLTHIRRIVPGAV <b>S</b> DGRMG <b>S</b> WRAP <b>P</b> TLSVPASPLT                                                                                                                                                                                                                                  |
|     | KLHL6        | THIRRIVPGAV <b>S</b> DGRMG <b>S</b> WRAP <b>P</b> TLS<br>VPASPLTLLQSHFRQQARV                                                                                                                                                                                                                                                         | LLQSHFRQQARVRHLSQEFGLWQIT <b>P</b> PGIP <b>V</b> HE <b>S</b> TAT <b>L</b><br><b>L</b> QHYSS <b>G</b> WAEK <b>S</b> KILSPDSKIQMVSSSQ <b>K</b> RALL <b>C</b> LIAL                                                                                                                                           |
|     | AR           | RHLSQEFGLWQIT <b>P</b> PGIP <b>V</b> HE <b>S</b> TAT <b>L</b><br><b>H</b> YSS <b>G</b> WAEK <b>S</b> KIL                                                                                                                                                                                                                             | <b>L</b> SRK <b>Q</b> T <b>W</b> KIR <b>T</b> CLRR <b>V</b> R <b>Q</b> K <b>C</b> F <b>T</b> LLSPQEAGAT <b>K</b> DE <b>C</b> E<br><b>G</b> E <b>E</b> G <b>A</b> GS <b>R</b> DL <b>R</b> S <b>W</b> V <b>T</b> E <b>E</b> T <b>G</b> M <b>P</b> N <b>K</b> AS <b>K</b> Q <b>G</b> P <b>G</b> S <b>T</b> Q |
|     | PDZD2        | SPDSKIQMVSSSQ <b>K</b> RALL <b>C</b> LIAL <b>S</b> SR <b>Q</b><br><b>T</b> W <b>K</b> IR <b>T</b> CLRR <b>V</b> R <b>Q</b> K <b>C</b> F                                                                                                                                                                                              | <b>R</b> E <b>G</b> S <b>L</b> E <b>I</b> P <b>L</b> T <b>N</b> I <b>Y</b> K <b>L</b> L <b>T</b> S <b>V</b> W <b>G</b> L <b>L</b> R <b>L</b> W <b>V</b> W <b>G</b> P <b>A</b> L <b>A</b> F <b>T</b><br><b>S</b> C <b>V</b> T <b>S</b> E <b>I</b> A <b>M</b> R <b>L</b> L                                  |
|     | HLA-DOA      | TLLSPQEAGAT <b>K</b> DE <b>C</b> E <b>G</b> E <b>E</b> G <b>A</b> GS <b>R</b> DL<br><b>R</b> S <b>W</b> V <b>T</b>                                                                                                                                                                                                                   |                                                                                                                                                                                                                                                                                                           |
|     | LONRF3       | EETGMPNKASK <b>Q</b> PG <b>P</b> G <b>S</b> T <b>Q</b> REG <b>S</b> L <b>E</b> E <b>I</b><br><b>P</b> G <b>L</b> T <b>N</b> I <b>Y</b> K <b>L</b> L <b>T</b> S <b>V</b> W <b>G</b> L <b>L</b> R <b>L</b> W <b>V</b> W <b>G</b> P <b>A</b> L<br><b>A</b> F <b>T</b> S <b>C</b> V <b>T</b> S <b>E</b> I <b>A</b> M <b>R</b> L <b>L</b> |                                                                                                                                                                                                                                                                                                           |

\*Red and bolded denotes mutated amino acids and neo-sequences encoded by point mutations, or nucleotide insertions or deletions. For splice-site donor mutations (*HLA-DOA* and *LONRF3*), we designed mutant minigene transcripts that continued into the downstream intron until the next stop codon, based on the assumption that the mutations prevented splicing at that site. The splice-site acceptor mutation in *DIP2C* was not assessed.
