# Supplementary material
Source: PubMed Central journal article supplement (PMC6686185)
Supplement: NIHMS1040986-supplement-TABLE_S4.pdf [file NIHMS1040986-supplement-TABLE_S4.pdf]

**Table S4.** TCR $\beta$  V-D-J sequences of V $\beta$ 22-positive ERBB2IP-mutation-reactive T-cell clones

| TCR V $\beta$           | V-D-J nucleotide sequence<br>(CDR3 highlighted)                                                                                                                                                                                                                                                                                                                                               | V-D-J amino acid<br>sequence<br>(CDR3 highlighted)                                                                                         | Number of<br>V $\beta$ 22 (TRBV2)<br>clones with<br>indicated V-D-J |
|-------------------------|-----------------------------------------------------------------------------------------------------------------------------------------------------------------------------------------------------------------------------------------------------------------------------------------------------------------------------------------------------------------------------------------------|--------------------------------------------------------------------------------------------------------------------------------------------|---------------------------------------------------------------------|
| V $\beta$ 22<br>(TRBV2) | GAACCTGAAGTCACCCAGACTCCCAGCCATCAGGT<br>CACACAGATGGGACAGGAAGTGATCTTGCGCTGT<br>GTCCCATCTCTAATCACTTATACTTCTATTGGTACA<br>GACAAATCTTGGGGCAGAAAGTCGAGTTTCTGGTT<br>TCCTTTTATAATAATGAAATCTCAGAGAAGTCTGAA<br>ATATTCGATGATCAATTCTCAGTTGAAAGGCCTGAT<br>GGATCAAATTTCACTCTGAAGATCCGGTCCACAAA<br>GCTGGAGGACTCAGCCATGTA CTCTGTGCCAGCA<br>GCCTGGGTGACAGGGGTAATGAAAACTGTTTTT<br>TGGCAGTGGAAACCCAGCTCTCTGTCTTGG | EPEVTQTPSHQVTQMG<br>QEVILRCVPISNHLYFYR<br>QILGQKVEFLVSFYNN EIS<br>EKSEIFDDQFSVERPDGS<br>NFTLKIRSTKLEDSAMYF<br>CASSLGDRGNEKLFFGS<br>GTQLSVL | 6/6                                                                 |
