# Supplementary material
Source: PubMed Central journal article supplement (PMC6686185)
Supplement: NIHMS1040986-supplement-TABLE_S5.pdf [file NIHMS1040986-supplement-TABLE_S5.pdf]

**Table S5.** TCR $\alpha$  V-J sequence of the V $\beta$ 22+ ERBB2IP-mutation-reactive T-cell clone

| TCR V $\alpha$ | V-J nucleotide sequence<br>(CDR3 highlighted)                                                                                                                                                                                                                                                                                                                                      | V-J amino acid sequence<br>(CDR3 highlighted)                                                                                      |
|----------------|------------------------------------------------------------------------------------------------------------------------------------------------------------------------------------------------------------------------------------------------------------------------------------------------------------------------------------------------------------------------------------|------------------------------------------------------------------------------------------------------------------------------------|
| TRAV26-2       | GATGCTAAGACCACACAGCCAAATTC AATGGAG<br>AGTAACGAAGAAGAGCCTGTTCACTTGCCTTGTA<br>ACCACTCCACAATCAGTGGA ACTGATTACATACA<br>TTGGTATCGACAGCTTCCCTCCCAGGGTCCAGAG<br>TACGTGATTCATGGTCTTACAAGCAATGTGAACA<br>ACAGAATGGCCTCTCTGGCAATCGCTGAAGACA<br>GAAAGTCCAGTACCTTGATCCTGCACCGTGCTAC<br>CTTGAGAGATGCTGCTGTGTACTACTGCATCCTG<br>AGACGTTCTTAACGACTACAAGCTCAGCTTTGGAG<br>CCGGAACCACAGTAACTGTAAGAGCAA | DAKTTQPNSMESNEEEPVHLP<br>CNHSTISGTDYIHWYRQLPSQ<br>GPEYVIHGLTSNVNNRMA<br>SLAIAEDRKSSTLILHRATLRDA<br>AVYVCILRRLNDYKLSFGAGTT<br>VTVRA |
