# Supplementary material
Source: PubMed Central journal article supplement (PMC6686185)
Supplement: NIHMS1040986-supplement-TABLE_S6.pdf [file NIHMS1040986-supplement-TABLE_S6.pdf]

**Table S6.** Most frequent TCR $\beta$  V-D-J sequence of V $\beta$ 22-negative ERBB2IP-mutation-reactive T cells\*

| TCR V $\beta$              | V-D-J nucleotide sequence<br>(CDR3 highlighted)                                                                                                                                                                                                                                                                                                                                           | V-D-J amino acid<br>sequence<br>(CDR3 highlighted)                                                                                            | Number of TOPO-<br>TA clones with<br>indicated V-D-J |
|----------------------------|-------------------------------------------------------------------------------------------------------------------------------------------------------------------------------------------------------------------------------------------------------------------------------------------------------------------------------------------------------------------------------------------|-----------------------------------------------------------------------------------------------------------------------------------------------|------------------------------------------------------|
| V $\beta$ 5.2<br>(TRBV5-6) | GACGCTGGAGTCACCCAAAGTCCCACACACCTGAT<br>CAAAACGAGAGGACAGCAAGTGACTCTGAGATGC<br>TCTCCTAAGTCTGGGCATGACACTGTGTCCTGGTAC<br>CAACAGGCCCTGGGTCAGGGGCCCCAGTTTATCTT<br>TCAGTATTATGAGGAGGAAGAGAGACAGAGAGGC<br>AACTTCCCTGATCGATTCTCAGGTCACCAGTTCCT<br>AACTATAGCTCTGAGCTGAATGTGAACGCCTTGT<br>GCTGGGGGACTCGGCCCTCTATCTCTGTGCCAGCA<br>GCAAAGGCCCGGGAGGCAACTACGAGCAGTACTT<br>CGGGCCGGGCACCAGGCTCACGGTCACAG | DAGVTQSPTHLIKTR<br>GQQVTLRCSPKSGHD<br>TVSWYQQALGQGPQ<br>FIFQYEEEEERQRGNF<br>PDRFSGHQFPNYSSE<br>LNVNALLGDSALYLC<br>ASSKGPGGNYEQYF<br>GPGTRLTVT | 3/7                                                  |

\* V $\beta$ 22-negative cells that upregulated OX40 upon stimulation with mutated ERBB2IP were sorted and expanded. RNA from these cells was then isolated and underwent 5'RACE with TCR- $\beta$  constant chain primers to identify the expressed TCR-V $\beta$  sequences. TOPO-TA cloning was performed on the PCR products and individual colonies were then sequenced. Flow cytometry demonstrated that 40-50% of these T cells were V $\beta$ 5.2 (TRBV5-6). By Sanger sequencing, 3/7 TOPO-TA colonies were V $\beta$ 5.2 (TRBV5-6) with the indicated sequence above.
