# Supplementary material
Source: PubMed Central journal article supplement (PMC6686185)
Supplement: NIHMS1040986-supplement-TABLE_S7.pdf [file NIHMS1040986-supplement-TABLE_S7.pdf]

**Table S7. Immunohistochemistry analysis of T-cell infiltrates pre- and post-ACT\***

| Tumor Nodule | CD3   |        | CD8   |        | CD4   |        |
|--------------|-------|--------|-------|--------|-------|--------|
|              | Tumor | Stroma | Tumor | Stroma | Tumor | Stroma |
| Pre-1A       | 0-1   | 1      | 0-1   | 1      | 0-1   | 1      |
| Pre-2A       | 0-1   | 1      | 0-1   | 1      | 0     | 0      |
| Pre-3A       | 0     | 0-1    | 0     | 0-1    | 0     | 0      |
| Pre-3B       | 0-1   | 1      | 0-1   | 0-1    | 0-1   | 1      |
| Post-1A      | 1     | 1      | 1     | 1      | 0-1   | 1      |
| Post-1B      | 1     | 2      | 1-2   | 2      | 1     | 2      |
| Post-2A      | 0-1   | 1      | 0-1   | 1      | 0-1   | 0-1    |

\*Post-ACT tumors were harvested approximately 17 months after the first ACT.

A positive control (tonsil) was included for all stains.

0, no infiltrate

1, rare to few

2, moderately dense

3, very dense
