# Supplementary material
Source: PubMed Central journal article supplement (PMC6686185)
Supplement: NIHMS1040986-supplement-TABLE_S8.pdf [file NIHMS1040986-supplement-TABLE_S8.pdf]

**Table S8.** Immunohistochemistry analysis of MHC expression on tumors pre- and post- ACT\*

| <b>Tumor Nodule</b> | <b>HLA-I</b> | <b>HLA-II (HLA-DR)</b> |
|---------------------|--------------|------------------------|
| Pre-1A              | 1-2, >50%    | 0                      |
| Pre-2A              | 1-2, >50%    | 0                      |
| Pre-3A              | 1, >50%      | 0                      |
| Pre-3B              | 2, >50%      | 0                      |
| Post-1A             | 2-3, >50%    | 0                      |
| Post-1B             | 3, >50%      | 0                      |
| Post-2A             | 2, >50%      | 0                      |

\*Post-ACT tumors were harvested approximately 17 months after the first ACT.

> 50% denotes greater than 50% of the tumor cells were positive.

A positive control (tonsil) was included for all stains.

0, negative

1, weakly positive

2, moderately positive

3, strongly positive
